# Supplementary material for: Pomalidomide enhances CAR-T cell therapeutic efficacy and Remodels Immune Microenvironment in Lymphoid Malignancies
Source: Research Square preprint supplement (doi:10.21203/rs.3.rs-6571044/v1), 2025-05-08
Supplement: Supplementary file 1 [file 328cfc84b1200fb4b7405621.docx]

**Supplementary Table 1**.

| Target Gene | Forward primer（5’→3’） | Reverse primer（5’→3’） |
| --- | --- | --- |
| *IL2* | TCCTGTCTTGCATTGCACTAAG | CATCCTGGTGAGTTTGGGATTC |
| *IFNG* | TCGGTAACTGACTTGAATGTCCA | TCGCTTCCCTGTTTTAGCTGC |
| *CXCL9* | CCAGTAGTGAGAAAGGGTCGC | AGGGCTTGGGGCAAATTGTT |
| *CXCL10* | GTGGCATTCAAGGAGTACCTC | TGATGGCCTTCGATTCTGGATT |
| *CXCL11* | GACGCTGTCTTTGCATAGGC | GGATTTAGGCATCGTTGTCCTTT |
| *ATCB* | GCACAGAGCCTCGCCTT | GTTGTCGACGACGAGCG |
